# Supplementary material for: Fast and accurate learned multiresolution dynamical downscalingfor precipitation
Source: Copernicus journal article supplement (doi:10.5194/gmd-2020-412), 2021-01-27
Supplement: Supplementary file [file gmd-2020-412-RC1-supplement.pdf]

---

## Summary of the main contribution

This manuscript proposes a novel deep learning approach to perform precipitation downscaling. Specifically, the authors do this by training five different CNN models (SR-CGAN, Directed/Encoded-Simple, Direct/Encoded-CGAN) to both low- and high- resolution (i.e., 50km and 12km horizontal resolution, respectively) Weather Research and Forecasting (WRF) simulations. The authors apply their methods to a one year WRF simulation and they assess the performance in terms of MSE, probability density function, spatial pattern of some selected summary statistics, and event-based rainfall intensity, duration, size, and total volume. Overall, I found the paper to be well motivated and most of it to be well described. However, I do have some concerns about the evaluation metrics used in this work.

## Major points

My major concern has to do with some of the evaluation metrics used in this work:

1. **MSE:** I am not quite sure why the authors define MSE as  $\frac{1}{N} \sum_{i=1}^N (Y_i - \bar{Y})^2$ , where  $N$  is the total number of grids,  $Y_i$  is the (fitted) prediction value at grid  $i$ , and  $\bar{Y}$  is the average prediction across all the grids. A more sensible MSE would be  $\frac{1}{N} \sum_{i=1}^N (Y_i - Y_{i, \text{Ground Truth}})^2$ . Also, I am not sure there is a need to calculate MSE at each timestep unless the authors plan to explore how MSE varies with time. Therefore I would suggest the authors to calculate MSE as  $\frac{1}{N \times T} \sum_{i=1}^N \sum_{t=1}^T (Y_{i,t} - Y_{i,t, \text{Ground Truth}})^2$ , where  $T$  is the total time steps during the testing period.
2. **Precipitation Distribution:** I don't think J-S distance used here is very informative, a single number does not tell us *how* two distributions are different (and such assessment can be made, at least qualitatively, using log-pdfs shown in Fig. 6). However, it would be of interest to show spatial maps of J-S distance at each grid cell across different methods as it could potentially provide additional information for sub-region assessment in terms of fitted distributions. I would also suggest to replace the log-pdf curves in Fig. 6 by QQplots, that is, for each region, plot true (empirical) quantiles against the predicted quantiles. Quantile values are more directly interpretable than these log-density curves.

## Minor points

- ★ page 2, line 42-43 “*Running an RCM is computationally expensive, however, and typically cannot be applied to large ESM ensembles*”:

Please include reference for the Canadian Regional Climate Model Large Ensemble here, for example, Kirchmeier-Young, M. C., N. P. Gillett, F. W. Zwiers, A. J. Cannon, F. S. Anslow, 2018: Influence of human-induced climate change on British Columbias extreme 2017 fire season. *Earth's Future*, 7, 2-10. <https://doi.org/10.1029/2018EF001050>.

- ★ page 4, line 100 “*The data used in this study are one-year outputs...*”:

Did the authors apply their methods to another one-year outputs to check if (qualitatively) similar conclusions can be obtained?

- ★ page 13, Table 2:

---

These information can be well summarized by a scatterplot by putting regions on x-axis and MSEs on y-axis with different color/line symbol combinations for these CNN models.

★ Figs. 7-9:

I would suggest the authors to plot relative error maps to better compare between different CNN model fits.

★ Fig 10:

I would recommend to use QQplots here for easier comparison.
